# Supplementary material for: Effect of Prolonged and Substantial Weight Loss on Incident Atrial Fibrillation: A Systematic Review and Meta-Analysis
Source: MDPI journal article supplement (doi:10.3390/nu15040940), 2023-02-14
Supplement: s1 [file s1]

Supplementary File to  
Effect of prolonged and substantial weight loss on incident atrial fibrillation. A systematic review and meta-analysis  
Antonio E. Pontiroli, Lucia Centofanti, Carel Le Roux, Silvia Magnani, Elena Tagliabue, Franco Folli

Supplementary Table S1. sensitivity analyses

Supplementary Table S2. comparison of results obtained with random model (OR), fixed model, and risk ratios published by authors

Supplementary Figure S1. Meta-analysis after exclusion of study [32].

Supplementary Table S3. The Newcastle Ottawa Scale [34]

Supplementary Table S4. Comparison of baseline conditions of patients undergoing bariatric surgery (BS) and controls in the ten studies included in this meta-analysis

Supplementary Table S1. sensitivity analyses

| Sensitivity analysis                         | Studies | OR (95% CI), p             | Heterogeneity (Q), p, I2 |
|----------------------------------------------|---------|----------------------------|--------------------------|
| Bariatric surgery vs controls                | 10      | 0.665 (0.475-0.929), 0.017 | 48.98, p = 0.001, 81.6%  |
| Percent weight loss > 22%                    | 5       | 0.525 (0.316-0.872), 0.013 | 25.52, p = 0.001, 84.3%  |
| Percent weight loss < 22%                    | 5       | 0.827 (0.539-1.271), 0.387 | 22.30, p = 0.001, 82.1%  |
| Percent weight loss < 22% *                  | 4       | 0.696 (0.547-0.885), 0.003 | 9.71, p = 0.021, 69.1%   |
| Percentage of patients with diabetes < 100   | 7       | 0.596 (0.406-0.875), 0.008 | 30.19, p = 0.001, 80.1%  |
| Percentage of patients with diabetes = 100   | 3       | 0.880 (0.394-1.969), 0.756 | 18.43, p = 0.001, 89.1%  |
| Percentage of patients with diabetes = 100 * | 2       | 0.629 (0.443-0.893), 0.010 | 3.92, p = 0.048, 74.5%   |
| Newcastle Ottawa Scale > mean value          | 6       | 0.570 (0.365-0.890), 0.013 | 29.64 p = 0.001, 83.1%   |
| Newcastle Ottawa Scale < mean value          | 4       | 0.840 (0.477-1.478), 0.545 | 19.27 p = 0.001, 84.4%   |
| Newcastle Ottawa Scale < mean value *        | 3       | 0.661 (0.498-0.878), 0.004 | 5.34 p = 0.096, 62.6%    |

\* excluded study [32]

Supplementary Table S2. comparison of results obtained with random model (OR), fixed model, and risk ratios published by authors

| Sensitivity analysis                         | Studies | OR (95% CI), p             | RR (95% CI), p             | ES (95% CI, p               |
|----------------------------------------------|---------|----------------------------|----------------------------|-----------------------------|
| Bariatric surgery vs controls                | 10      | 0.665 (0.475-0.929), 0.017 | 0.687 (0.564-0.839), 0.001 | 0.687 (0.576-0.819), 0.001  |
| Percent weight loss > 22                     | 5       | 0.525 (0.316-0.872), 0.013 | 0.508 (0.310-0.832), 0.007 | 0.735 (0.637-0.849), 0.001  |
| Percent weight loss < 22%                    | 5       | 0.827 (0.539-1.271), 0.387 | 0.807 (0.630-1.033), 0.088 | 0.832 (0.609-1.136), 0.247  |
| Percent weight loss < 22 *                   | 4       | 0.696 (0.547-0.885), 0.003 | 0.712 (0.596-0.851), 0.001 | 0.757 (0.609-0.875), 0.001  |
| Percentage of patients with diabetes < 100   | 7       | 0.596 (0.406-0.875), 0.008 | 0.633 (0.493-0.812), 0.001 | 0.706 (0.557-0.895), 0.004  |
| Percentage of patients with diabetes = 100   | 3       | 0.880 (0.394-1.969), 0.756 | 0.855 (0.539-1.356), 0.506 | 0.806 (0.581-1.119), 0.197  |
| Percentage of patients with diabetes = 100 * | 2       | 0.629 (0.443-0.893), 0.010 | 0.649 (0.505-0.834), 0.001 | 0.770 (0.619-0.958), 0.019  |
| Newcastle Ottawa Scale > mean value          | 6       | 0.570 (0.365-0.890), 0.013 | 0.610 (0.458-0.812), 0.001 | 0.647 (0.499- 0.840), 0.001 |
| Newcastle Ottawa Scale < mean value          | 4       | 0.840 (0.477-1.478), 0.545 | 0.821 (0.578-1.166), 0.270 | 0.759 (0.612-0.942), 0.012  |
| Newcastle Ottawa Scale < mean value *        | 3       | 0.661 (0.498-0.878), 0.004 | 0.670 (0.549-0.819), 0.001 | 0.810 (0.688- 0.954), 0.012 |

\* excluded study [32]

Supplementary Figure S1. Meta-analysis after exclusion of study [32].

A. Forest plot of pooled hazard ratios of atrial fibrillation; B. funnel plots with 95% CI; C. meta-regression analysis of effect as a function of BMI of BS patients (A) and of the whole cohort (B). OR = Odds Ratio; 95% CI = confidence interval;

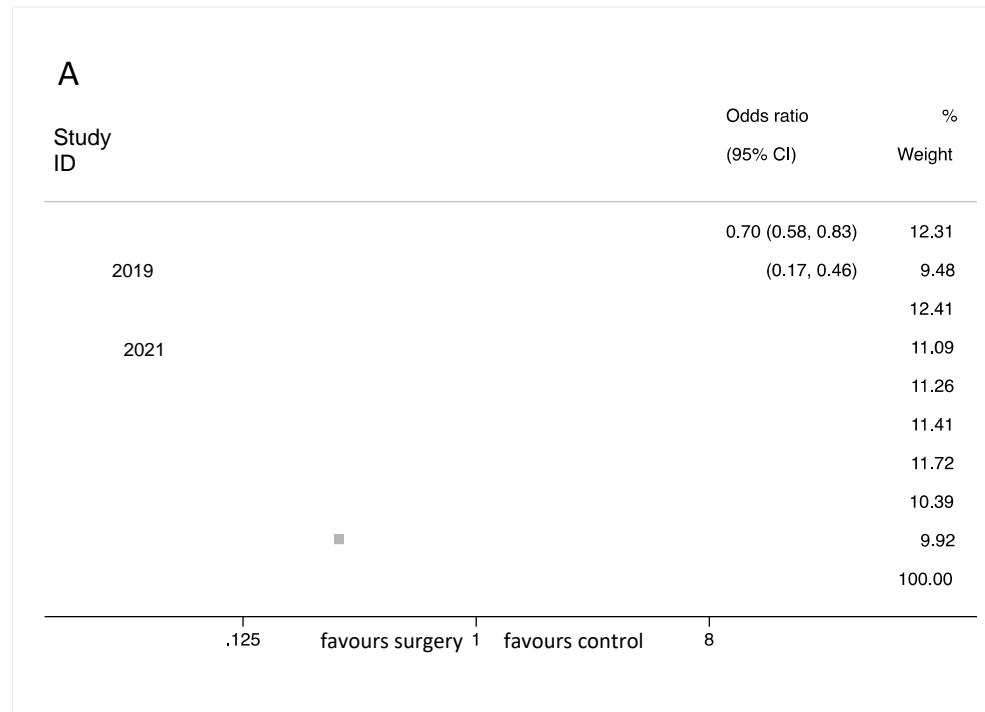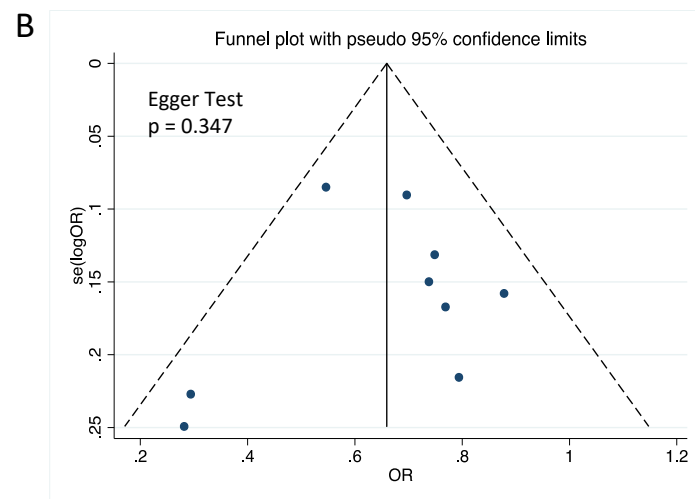

**C**

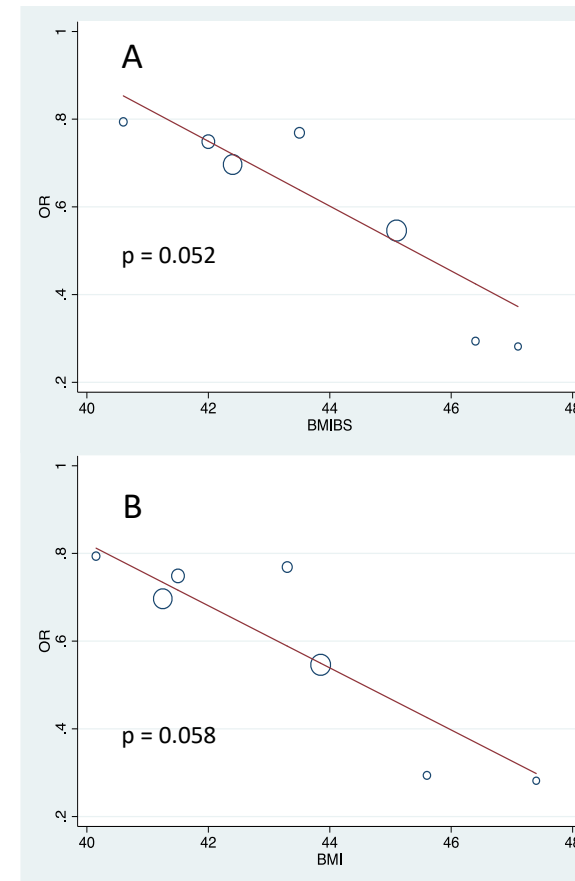

### Supplementary Table S3. The Newcastle Ottawa Scale [34]

The Newcastle Ottawa Scale accredits a 1star (=yes, when adequate quality was assessed) or 0 (=no) for specific point in three subcategories.

#### Selection

- 1- Representativeness of the exposed cohort
- 2- Selection of the non-exposed cohort
- 3- Ascertainment of exposure
- 4- Demonstration that outcome of interest was not present at start of study

#### Comparability of cohorts on the basis of the design or analysis controlled for confounders

- 1- The study controls for age, sex and marital status
- 2- Study controls for other factors

#### Outcome

- 1- Assessment of outcome
- 2- Was follow-up long enough for outcomes to occur? Minimum of 5 years
- 3- Adequacy of follow-up of cohorts

According to the total score, the Newcastle-Ottawa scales was then expressed as good, intermediate, or poor quality study:

- Good quality: 3 or 4 stars in selection domain AND 1 or 2 stars in comparability domain AND 2 or 3 stars in outcome/exposure domain (total score 7 to 9)
- Fair quality: 2 stars in selection domain AND 1 or 2 stars in comparability domain AND 2 or 3 stars in outcome/exposure domain (total score 6)
- Poor quality: 0 or 1 star in selection domain OR 0 stars in comparability domain OR 0 or 1 stars in outcome/exposure domain (total score 4 to 5)

Supplementary Table S4. Comparison of baseline conditions of patients undergoing bariatric surgery (BS) and controls in the ten studies included in this meta-analysis.

|                          | BS patients | Control patients | p     |
|--------------------------|-------------|------------------|-------|
| Number                   | 22831       | 38366            |       |
| % women                  | 72.1±11.88  | 70.9±11.95       | NS    |
| Age (years)              | 49.0±4.68   | 49.2±5.25        | NS    |
| BMI (kg/m <sup>2</sup> ) | 43.7±2.28   | 42.6±2.63        | NS    |
| Follow-up (years)        | 7.7±5.68    | 7.9±5.59         | NS    |
| % diabetes               | 47.5±36.80  | 46.6±38.42       | NS    |
| % hypertension           | 56.8±22.31  | 55.7±20.89       | NS    |
| % coronary heart disease | 8.5±7.40    | 8.9±7.69         | NS    |
| % heart failure          | 7.1±6.14    | 8.8±8.16         | NS    |
| % weight loss            | 28.1±17.04  | 2.9±3.29         | 0.001 |

Absolute numbers and percentages. Mean ± SD.

BMI = body mass index; % = percentage; NS = non-significant
